# Supplementary material
Source: PubMed Central journal article supplement (PMC3675933)
Supplement: AEM.00633-13_zam999104448so1.pdf [file AEM.00633-13_zam999104448so1.pdf]

1 **Supplementary material:** Hidalgo-Cantabrana, *et al.*

## 2 **MATERIAL AND METHODS**

### 3 **Bacterial strains and growth conditions**

4 Three closely related *B. animalis* subsp. *lactis* strains were used in this study: A1 (parental,  
5 isolated from a dairy fermented product), A1dOx (adapted to OxGall [Sigma] by exposure of strain A1 to  
6 increasing concentrations of these bile salts) and A1doxR (derivative of A1dOx which, after consecutive  
7 generations in the absence of bile, spontaneously acquired a rropy phenotype). The three strains are able to  
8 synthesise EPS, but only the strain A1dOxR has a rropy phenotype. These strains were cultivated in  
9 MRSC [MRS containing 0.25% L-cysteine-HCl (Sigma-Chemical Co., St. Louis, MO)] at 37°C under  
10 anaerobic conditions (80% N<sub>2</sub>, 10% CO<sub>2</sub>, 10% H<sub>2</sub>) in a MG500 chamber (Don Whitley Scientific, West  
11 Yorkshire, UK). For routine manipulation and counting, MRS from Biokar (Biokar Diagnostics,  
12 Beauvais, France) was used; whereas, the growth curves and proteomic and transcriptomic analyses were  
13 performed in MRS from Difco (Difco, BD Biosciences, San Diego, CA).

14 Strains from stocks (stored in MRSC +10% glycerol at -80°C) were plated on the surface of agar-  
15 MRSC and a single colony per strain was picked up to inoculate 10 ml MRSC broth. After overnight  
16 incubation this culture was used to inoculate (1%) different volumes of MRSC depending on the  
17 experimental setup. For growth curves, 300 ml of fresh MRSC were inoculated, homogenized by stirring  
18 and distributed in different volumes (from 15 ml up to 50 ml) and incubated at variable lengths of time  
19 during 24 h. At each sampling point, one tube was removed from the anaerobic chamber to perform the  
20 corresponding analyses. For proteomic analysis, 50 ml of MRSC were (1%) inoculated and incubated  
21 until they reached an OD<sub>600 nm</sub> of about 1 (middle exponential phase, around 6±1 h). For gene expression  
22 analyses, 10 ml of MRSC were inoculated and incubated, as previously described, for variable times  
23 depending on the gene to be tested.

### 24 **Proteomic analysis**

25 The proteome of the strains A1dOx and A1dOxR was determined by means of two dimensional  
26 (2D) electrophoresis analyzing three biological replicates, each one done at least in duplicated gels.

27 Middle-exponential phase cultures were collected by centrifugation and washed twice with PBS before  
28 proceeding with the lysis protocol. The cells were broken with ultrasonic treatment (Sonics & materials,  
29 Vibra-cell, model VC600, 20 kHz) by sonication twice for one minute and keeping them on ice for one  
30 minute between the sonications. Next, unbroken cells and cell debris were removed by centrifugation at  
31 ( $15\,000 \times g$  at  $4\text{ }^{\circ}\text{C}$ , 5 minutes). The proteins were precipitated by methanol-chloroform (3:1, vol/vol)  
32 according to the method described by Wessel and Flugge (6), and the protein concentration of the extract  
33 was determined using Pierce® BCA Protein Assay Kit (Thermo Fisher Scientific Inc., Rockford, IL,  
34 USA) according to the manufacturer's instructions. The protein extracts were frozen at  $-20\text{ }^{\circ}\text{C}$  until  
35 further use.

36 The proteome of these strains was analysed using different 2D-electrophoresis techniques: i) 2D-  
37 gel electrophoresis with traditional blue Coomassie staining (2D-PAGE), to obtain reference maps to  
38 spot pick for mass spectrometry analysis, and ii) 2D-difference in gel electrophoresis (2D-DIGE). For  
39 2D-PAGE, 500  $\mu\text{g}$  of protein were solubilized in 450  $\mu\text{l}$  Destreak Rehydration Solution (GE HealthCare,  
40 Biosciences, Uppsala, Sweden) supplemented with 0.5 % IPG Buffer (pH 4-7, GE Healthcare). These  
41 solutions were used to rehydrate Immobiline™ Drystrips (pH 4-7, 24 cm, GE Healthcare) using an Ettan  
42 IPGphor device (GE Healthcare) and focused for 60,000 V. Focused strips were then equilibrated for 15  
43 min in equilibration buffer (1 M Tris-HCl, pH 6.8, containing 6 M urea, 30% [vol/vol] glycerol) and 1%  
44 (wt/vol) sodium dodecyl sulfate) supplemented with 0.83% (wt/vol) dithiothreitol in the first equilibration  
45 step and with 7.5% (wt/vol) iodoacetamide in the second one. The second-dimension separation was  
46 performed in 12.5% polyacrylamide gels in an Ettan DALTsix electrophoresis unit (GE Healthcare) at a  
47 constant current of 16 mA per gel, at  $4\text{ }^{\circ}\text{C}$ . After the electrophoresis, the gels were stained with  
48 Gelcode™ Blue Safe Protein Stain (Thermo Fisher Scientific) according to the manufacturer's  
49 instructions and finally, the gels were scanned with Imagescanner using Labscan software (Amersham  
50 Biosciences). The same protein extracts were also analyzed by 2D-DIGE using fluorescent dyes  
51 (Amersham CyDye DIGE Fluors, GE Healthcare). After protein precipitation, samples were solubilized  
52 in 20  $\mu\text{l}$  lysis buffer (30 mM Tris, 7 M urea, 2 M thiourea and 4 % (w/v) CHAPS at pH 8.5. Each sample

53 was labeled with different Amersham CyDye DIGE Fluors (minimal dyes: Cy2, Cy3 and Cy5) for Ettan  
54 DIGE (GE Healthcare). Briefly, 333 pmol of dye was used for labeling 50 µg of protein and the samples  
55 were incubated on ice for 30 min in darkness. After the incubation, 1 µl of 10 mM lysine was added to  
56 stop the reaction and the samples were incubated in the same conditions for 10 min. Then, 20 µl of 2X  
57 Sample buffer [8 M Urea, 130 mM DTT, 4 % (w/v) CHAPS, 2 % (v/v) IPG Buffer, pH 4-7, GE  
58 Healthcare] was added to the samples and they were incubated on ice in darkness for 10 min. Samples for  
59 the same gels were pooled together and 330 µl of rehydration buffer [8 M Urea, 4 % (w/v) CHAPS, 1 %  
60 (v/v) IPG Buffer, pH 4-7 and 13 mM DTT] was added to the pooled samples. Immobiline™ Drystrips  
61 (pH 4-7, 24 cm, GE Healthcare) were rehydrated with the protein solutions and both first-dimensional  
62 isoelectric focusing and second dimension separation were performed as described before. In this case, 50  
63 µg of protein labeled with fluorescent dyes were loaded in the gels. Finally, gels were scanned in a  
64 Typhoon 9400 scanner (GE Healthcare) at a resolution of 100 µm. Spots showing clear differences  
65 among strains were chosen for further analysis. Selected spots were excised from the 2D-PAGE gels  
66 visualized with Gelcode™ stain and sent to “Unidad de Proteómica- Fundación Centro Nacional de  
67 Investigaciones Cardiovasculares Carlos III” (Madrid, Spain) for in-gel trypsin digestion and  
68 identification by matrix-assisted laser desorption/ionization coupled to time of flight mass spectrometry  
69 (MALDI-TOF) analysis.

## 70 **Physiological and gene expression analyses**

71 Growth curves of the three strains under study were followed for 24 h and samples were taken  
72 every 2 h to monitor the pH decrease, the increase in OD, the bacterial counts, the EPS and organic acids  
73 production, as well as the expression of some specific genes. Growth curves were performed, at least, in  
74 two biological replicates and measurements in each replicate were done in duplicate. The pH decrease  
75 was monitored by using the Crison pH-Meter basic 20 (Crison Instruments SA, Barcelona, Spain). The  
76 OD<sub>600 nm</sub> was determined using the BioPhotometer plus apparatus (Eppendorf, Hamburg, Germany); from  
77 these data, the specific growth rate ( $\mu$ ) and the generation time were calculated from the linear regression  
78 curves of  $\ln OD_{600 nm}$  vs. time corresponding with the growth phase. For bifidobacterial counting, serial

79 dilutions of samples were made in Ringer, pour plated in agar-MRSC and incubated under anaerobic  
80 conditions for 48 h. The organic acids production (expressed in mM) was directly measured in the  
81 bacteria-free supernatants (50  $\mu$ l injection volume) by means of ion-exchange HPLC. The  
82 chromatographic system from Waters (Waters, Milford, MA) and the column ICSep-ION-300  
83 (Transgenomic, San José, CA) previously described (1) were used.

84 To follow the EPS production during growth, a method based on the use of fluorescent-conjugated  
85 lectins was optimised. Samples from each incubation point were centrifuged (10,000 $\times$ g, 15 min at 4°C),  
86 washed twice with PBS and resuspended in 1 ml of PBS. When necessary (from 0 to 6 h), samples were  
87 concentrated in PBS to have around  $1 \times 10^9$  cfu/ml. To favour the attachment of the lectin to the EPS  
88 matrix surrounding the bacterial surface, the cellular suspensions were treated in a Vibra-Cell™ sonicator  
89 (Sonics & Materials Inc., Danbury, Connecticut) using 2 cycles of continuous ultrasound of 1 min with an  
90 intermediate period of cold-storage of 1 min. Afterwards, cells were collected by centrifugation,  
91 resuspended in the same volume of PBS and 475  $\mu$ l of these bacterial suspensions were mixed with 25  $\mu$ l  
92 of concanavalin A-Alexa Fluor488-conjugate (Molecular Probes Invitrogen, Merck, Darmstadt,  
93 Germany) to give a final lectin-concentration of 50  $\mu$ l/ml. The staining procedure and fluorescence  
94 determination was performed in a Cary Eclipse fluorescence-spectrometer (Varian Ibérica SA, Madrid,  
95 Spain) as previously described (5). Values of fluorescence emitted were corrected by the number of  
96 bifidobacteria obtained at each sampling point and, finally, the relative fluorescence was calculated with  
97 respect to the initial point (0 h, relative fluorescence = 1). The linearity range between fluorescence  
98 emitted and number of bifidobacteria cells was found to be between  $5 \times 10^8$  and  $10^{10}$  cfu/ml, with  
99 correlation coefficients of  $R^2 = 0.989 \pm 0.002$ . Additionally, to discard the quantification of components  
100 from MRSC broth potential adhered to bifidobacterial surface, the biomass from each strain was  
101 harvested from the surface of agar-MRSC plates (3). These cellular suspensions were processed as  
102 previously described, obtaining similar linearity range ( $R^2 = 0.976 \pm 0.005$ ). Finally, the ropy phenotype  
103 was visually determined by the occurrence of a filament when a sterile tip was introduced in each  
104 sampling-point culture (4).

105 Quantitative reverse transcription-PCR (qPCR) was used to achieve the expression of the two  
106 genes coding for the priming-GTF and the three genes involved in the rhamnose biosynthesis described  
107 within the *eps* cluster from *B. animalis* subsp. *lactis* A1dOxR, as well as one gene coding for a DNA-  
108 binding protein which was located outside the *eps* cluster. The *16S rRNA* and *recA* genes were used as  
109 endogenous reporter controls. The genome location of these genes, accordingly to the annotation of the  
110 type strain DSM10140, and the specific primers used in this study are indicated in Table 1. After cell  
111 collection, bifidobacteria were mixed with RNA protective bacterial reagent (Qiagen GmbH, Hilden,  
112 Germany) and stored at -20°C until use. The RNA was extracted with the RNeasy minikit (Qiagen)  
113 following the manufacturer's instructions with modifications previously published (5); 3 µg was reverse  
114 transcribed into cDNA to perform the qPCR using the ABI Prism 7500 equipment (Applied Biosystems,  
115 Foster City, CA) and the SYBR green PCR master mix (Applied Biosystems). Thermal cycling was:  
116 initial step 95°C for 10 min and 35 cycles of 95°C for 15 s and 60°C for 1 min. Data obtained for each  
117 strain and culture condition, were referred to their reporter genes.

## 118 **Statistical analysis**

119 Physiological data were analysed by means of independent one-way ANOVA tests in order to  
120 assess differences among the three strains and, when necessary, the mean comparison LSD (least  
121 significant difference) test was applied (significance level,  $p < 0.05$ ). The statistical package SPSS/PC 15.0  
122 (SPSS Inc., Chicago, IL) was used for this analysis.

## 124 **REFERENCES**

- 125 1. **Burns P, Sánchez B, Vinderola G, Ruas-Madiedo P, Ruiz L, Margolles A, Reinheimer J, de**  
126 **los Reyes-Gavilán CG.** 2010. Inside the adaptation process of *Lactobacillus delbrueckii* subsp.  
127 *lactis* to bile. Int. J. Food Microbiol. **142**:132-141.
- 128 2. **Gueimonde M, Tölkö S, Korpimäki T, Salminen S.** 2004. New real-time quantitative PCR  
129 procedure for quantification of bifidobacteria in human fecal samples. Appl. Environ. Microbiol.  
130 **70**:4165-4169.

- 131 3. **López P, Monteserín DC, Gueimonde M, de los Reyes-Gavilán, CG, Margolles A, Suárez A,**  
132 **Ruas-Madiedo P.** 2012. Exopolysaccharide-producing *Bifidobacterium* strains elicit different *in*  
133 *vitro* responses upon interaction with human cells. Food Res. Int. **46**:99-107.
- 134 4. **Ruas-Madiedo P, de los Reyes-Gavilán CG.** 2005. Methods for the screening, isolation and  
135 characterization of exopolysaccharides produced by lactic acid bacteria. J. Dairy Sci. **88**:843-856.
- 136 5. **Ruas-Madiedo P, Gueimonde M, Arigoni F, de los Reyes-Gavilán CG, Margolles A.** 2009.  
137 Bile affects the synthesis of exopolysaccharides by *Bifidobacterium animalis*. Appl. Environ.  
138 Microbiol. **75**:1204-1207.
- 139 6. **Wessel D, Flugge UI.** 1984. A method for the quantitative recovery of protein in dilute solution in  
140 the presence of detergents and lipids. Anal. Biochem. **138**:141-143.
- 141

142 **Table S1** Primers used in this study for gene expression analyses by means of quantitative-reverse transcriptase-PCR  
 143

| <b>Name</b> | <b>Target gene<sup>1</sup></b> | <b>Predicted function</b>                              | <b>Sequence 5'→3'</b>                                                    | <b>Reference</b> |
|-------------|--------------------------------|--------------------------------------------------------|--------------------------------------------------------------------------|------------------|
| gtf01207    | Balat_1371                     | Undecaprenyl-phosphate sugar phosphotransferase (RfbP) | <b>F:</b> CGTGCTGAGTCGAAAGAATCG<br><b>R:</b> TTGTAGAACGTGATCGGCTCA       | (5)              |
| gtf00468    | Balat_1392                     | Galactosyltransferase (CpsD)                           | <b>F:</b> TGACGACTCGTTTGCAACTGA<br><b>R:</b> GCGCAGGCAGCGGAATAC          | (5)              |
| Rh1         | Balat_1376                     | dTDP-glucose pyrophosphorylase                         | <b>F:</b> GGAGCCATCGCCAAGCA<br><b>R:</b> GATTATCTCGACGCCGAAGGA           | This work        |
| Rh2         | Balat_1377                     | dTDP-4-dehydrorhamnose 3,5-epimerase                   | <b>F:</b> TGCACCTTGGCGGTACCA<br><b>R:</b> CAATCTGACCCTCGTGCATGT          | This work        |
| Rh3         | Balat_1378                     | dTDP-D-glucose 4,6-dehydratase                         | <b>F:</b> CCGGCACCAGTTCGTCAA<br><b>R:</b> CGAGTTCGTACATGGCAACATC         | This work        |
| Rh1-Rh2     | Balat_1376-1377                | Intergenic region and part of genes rh1 and rh2        | <b>F:</b> CGGCAAGAATAATGCCTTTCAT<br><b>R:</b> CCTATGTCTGAAGTCGAACTGAAGAA | This work        |
| Rh2-Rh3     | Balat_1377-1378                | Intergenic region and part of genes rh2 and rh3        | <b>F:</b> AAATTCCATAGTTCACGCTTTCCA<br><b>R:</b> GGGCCAGTGAATGCTTTGAAT    | This work        |
| Hb1         | Balat_0642                     | DNA-binding protein HB1                                | <b>F:</b> AGCAGACCGGTGAGCTTGAG<br><b>R:</b> AATGCTTTCCGCGATGTCTTC        | This work        |
| RecA        | Balat_1114                     | Recombinase A                                          | <b>F:</b> GGTGGGAATCACCTCGATGT<br><b>R:</b> GCTCTGCCATGCGTTTGG           | This work        |
| Bifido      | Balat_1279                     | 16S rDNA                                               | <b>F:</b> GATTCTGGCTCAGGATGAACGC<br><b>R:</b> CTGATAGGACGCGACCCCA        | (2)              |

144 <sup>1</sup>: gene location according to the genome annotation of the strain *Bifidobacterium animalis* subsp. *lactis* DSM10140 (accession number CP001606)
